# Supplementary material for: Prospective Observational Study on Neurotoxicity Induced by Paclitaxel-Based Chemotherapy Regimens and Its Impact on Quality of Life in Patients With Solid Tumors
Source: Research Square preprint supplement (doi:10.21203/rs.3.rs-8676274/v1), 2026-01-29
Supplement: Supplementary file 1 [file 952f1025c66119734d1c5c5c.pdf]

## ANNEXURE-I

### సమ్మతి పత్రం

**“A PROSPECTIVE OBSERVATIONAL STUDY ON NEUROTOXICITY INDUCED BY PACLITAXEL-BASED CHEMOTHERAPY REGIMENS AND ITS IMPACT ON QUALITY OF LIFE IN PATIENTS WITH SOLID TUMORS”.** అనే అధ్యయనంలో పాల్గొనడానికి

నేను \_\_\_\_\_ {పేరు} స్వచ్ఛందంగా సమ్మతిని ఇస్తున్నాను. అలా చేయడం ద్వారా నేను ఇలా ధృవీకరిస్తున్నాను:

- అధ్యయనం గురించి నా మాతృభాషలో నాకు పూర్తి సమాచారం ఇవ్వబడింది మరియు అధ్యయనం యొక్క ఉద్దేశ్యం మరియు స్వభావాన్ని మరియు అధ్యయనంలో నేను పాల్గొనడం వల్ల నాకు కలిగే సంభావ్య ప్రమాదాలను అర్థం చేసుకున్నాను.
- ప్రశ్నలు అడగడానికి నాకు తగినంత అవకాశం ఇవ్వబడింది, వాటికి నా తృప్తికి సమాధానాలు ఇవ్వబడ్డాయి.
- అధ్యయనంలో నేను పాల్గొనడం పూర్తిగా స్వచ్ఛందమని మరియు పాల్గొనడానికి ఇష్టపడకపోవడం/తిరస్కరణ నాకు రావాల్సిన వైద్య సంరక్షణను ప్రతికూలంగా ప్రభావితం చేయదని నేను అర్థం చేసుకున్నాను.
- అధ్యయనంలో నేను పాల్గొనడం వల్ల నాకు ఎటువంటి అదనపు వైద్య ఖర్చులు ఉండవని నాకు హామీ ఇవ్వబడింది.
- ఈ సమ్మతి పత్రంపై సంతకం చేయడానికి నేను ఎటువంటి బలవంతం ఎదుర్కోలేదు.
- నేను ఈ సమ్మతిపై సంతకం చేసినప్పటికీ, నాకు అర్హత ఉన్న వైద్య సంరక్షణ విషయంలో ఏ విధంగానూ రాజీ పడకుండా, ఏ సమయంలోనైనా అధ్యయనం నుండి వైదొలగవచ్చని నాకు తెలియజేయబడింది.

రోగి సంతకం:

రోగి పేరు:

తేదీ:

స్థలం:

సాక్షి సంతకం:

సాక్షి పేరు:

తేదీ:

స్థలం:

పరిశోధకుడి సంతకం:

పరిశోధకుడి పేరు:

తేదీ:

స్థలం:

## ANNEXURE – II

### INFORMED CONSENT FORM

I \_\_\_\_\_ {name} voluntarily give consent to participate in the study entitled “A PROSPECTIVE OBSERVATIONAL STUDY ON NEUROTOXICITY INDUCED BY PACLITAXEL-BASED CHEMOTHERAPY REGIMENS AND ITS IMPACT ON QUALITY OF LIFE IN PATIENTS WITH SOLID TUMORS”. In doing so I affirm that:

- I have been given full information in my native language about the study and have understood the purpose and nature of the study and the potential risks to me resulting from my participation in the study.
- I have been given ample opportunity to ask questions, which have been answered to my satisfaction.
- I understand that my participation in the study is purely voluntary and that unwillingness/refusal to participate will not adversely affect the medical care due to me.
- I have been assured that there is no additional medical expenditure to be incurred by me on account of my participation in the study.
- That I faced no coercion to sign this consent form.
- I have been informed that notwithstanding my signing this consent, I can withdraw from the study at any point of time, without it compromising in any way, the medical care to which I am entitled.

Signature of patient

Signature of Witness

Signature of

Investigator

Name of patient

Name of Witness

Name of Investigator

Date

Date

Date

Place

Place

Place

## ANNEXURE – III

### PATIENT DATA COLLECTION FORM:

#### **Patient information:**

Name:\_\_\_\_\_ Age: \_\_\_\_\_ Gender: \_\_\_\_\_

Height:\_\_\_\_\_ weight: \_\_\_\_\_ IP NO: \_\_\_\_\_

Phone number: \_\_\_\_\_ Education: \_\_\_\_\_ Occupation: \_\_\_\_\_

Social history:    Alcoholic: yes / no                      Smoker: yes / no

#### **Chief complaints:**

#### **Present illness:**

#### **Past medical history:**

**Past surgical history:**

**Lab test:**

**DIAGNOSIS:**

**DATA COLLECTION:**

**TYPE OF CANCER:**

**CHEMOTHERAPEUTIC REGIMEN:**

**DURATION OF CHEMOTHERAPY:**

**NUMBER OF CHEMOCYCLES PLANNED:**

## **ANNEXURE – IV**

### **DESIGNED QUESTIONNAIRE FORM**

Dear individual, Please answer the questions on this questionnaire form. This questionnaire will help the study of your present state of health. This information will assist me in choosing the appropriate direction to take in working towards creating your optimum level of health.

#### **SECTION 1: DEMOGRAPHIC DETAILS:**

- |                         |                      |
|-------------------------|----------------------|
| 1. Age :                | 2. Gender :          |
| 3. Height :             | 4. Weight :          |
| 5. Cancer diagnosis :   | 6. Stage of cancer : |
| 7. Any co-morbidities : |                      |

#### **SECTION 2 : CHEMOTHERAPY ASSESSMENT :**

- 8) What is the type of Paclitaxel-based regimen \_\_\_\_\_
- 9) How many cycles of Paclitaxel chemotherapy have you completed?  
(a) 1-3 cycles            (b) 4-6 cycles            (c) >6 cycles
- 10) What is the current dose of Paclitaxel in your regimen \_\_\_\_\_?
- 11) How often do you receive Paclitaxel chemotherapy?  
(a) 7 days            (b) 15 days            (c) 21 days
- 12) Have you noticed an increase in numbness, tingling or pain in your extremities as your progress through chemotherapy cycles, if yes, does it worsen after each? cycle \_\_\_\_\_
- 13) Do you take any of the following medications that may interact with Paclitaxel or contribute to neurotoxicity?  
(a) Antidepressants            (b) Anti-Inflammatory agents  
(c) Anticonvulsants            (d) Others: \_\_\_\_\_

#### **SECTION 3: NEUROTOXICITY ASSESSEMENT**

##### **SENSORY SYMPTOMS**

- 14) Have you experienced Numbness or tingling in your hands or feet?  
(a) Grade 0: not at all            (b) Grade 1: mild  
(c) Grade 2: moderate            (d) Grade 3: severe
- 15) Have you experienced any neuropathic pain?

- (a) Grade 0: not at all                      (b) Grade 1: mild  
(c) Grade 2: moderate                      (d) Grade 3: severe

16) Have you felt reduced sensation in your hands or feet?

- (a) Grade 0: not at all                      (b) Grade 1: mild  
(c) Grade 2: moderate                      (d) Grade 3: severe

17) Have you felt increased sensitivity to touch or temperature? (Ex: cold/hot objects)

- (a) Grade 0: not at all                      (b) Grade 1: mild  
(c) Grade 2: moderate                      (d) Grade 3: severe

### **MOTOR SYMPTOMS**

18) Have you experienced Muscle weakness that affects your daily activities?

- (a) Grade 0: not at all                      (b) Grade 1: mild  
(c) Grade 2: moderate                      (d) Grade 3: severe

19) Have you had difficulty standing or walking due to muscle weakness?

- (a) Grade 0: not at all                      (b) Grade 1: mild  
(c) Grade 2: moderate                      (d) Grade 3: severe

20) Have you experienced difficulty gripping or holding objects due to muscle weakness?

- (a) Grade 0: not at all                      (b) Grade 1: mild  
(c) Grade 2: moderate                      (d) Grade 3: severe

### **AUTONOMIC SYMPTOMS**

21) Have you experienced dizziness or fainting when standing up?

- (a) Grade 0 – not at all                      (b) Grade 1- mild  
(c) Grade 2- moderate                      (d) Grade 3 – severe

22) Have you noticed excessive sweating?

- (a) Grade 0 – not at all                      (b) Grade 1- mild

(c) Grade 2- moderate      (d) Grade 3 – severe

23) Have you experienced indigestion?

(a) Grade 0 – not at all      (b) Grade 1- mild

(c) Grade 2- moderate      (d) Grade 3 – severe

24) Have you experienced shooting or burning pain in your extremities?

(a) Grade 0 – not at all      (b) Grade 1- mild

(c) Grade 2- moderate      (d) Grade 3 – severe

#### **SECTION 4 : QUALITY OF LIFE ASSESSEMENT**

##### **PHYSICAL FUNCTIONING**

25) Have you experienced any decline in your overall quality of life during the past week?

a) not at all      (b) a little

(c ) quite a bit      (d) very much

26) Have you had trouble sleeping due to treatment?

(a) not at all      (b) a little

(c ) quite a bit      (d) very much

27) Have you felt fatigued?

(a) not at all      (b) a little

(c ) quite a bit      (d) very much

28) Have you experienced difficulty walking or performing daily activities?

(a) not at all      (b) a little

(c ) quite a bit      (d) very much

29) Have you experienced loss of appetite?

(a) not at all      (b) a little

(c ) quite a bit      (d) very much



30) Have you needed any help performing daily activities?

- (a) not at all (b) a little  
(c ) quite a bit (d) very much

### **SOCIAL FUNCTIONING**

31) Has your illness or treatment affected your family life or social interactions?

- (a) not at all (b) a little  
(c ) quite a bit (d) very much

32) Have you felt isolated or withdrawn from family or friends?

- (a) not at all (b) a little  
(c ) quite a bit (d) very much

### **COGNITIVE FUNCTIONING**

33) Have you experienced difficulty remembering things ?

- (a) not at all (b) a little  
(c ) quite a bit (d) very much

34) Have you noticed difficulty in concentrating?

- (a) not at all (b) a little  
(c ) quite a bit (d) very much

35) Have you noticed reduced attention or mental sharpness during tasks?

- (a) not at all (b) a little  
(c ) quite a bit (d) very much

### **ANNEXURE – V**

#### **డిజైన్ చేయబడిన ప్రశ్నాపత్రం ఫారం**

ప్రియమైన వ్యక్తి, దయచేసి ఈ ప్రశ్నాపత్రం ఫారమ్‌లోని ప్రశ్నలకు సమాధానం ఇవ్వండి. ఈ ప్రశ్నాపత్రం మీ ప్రస్తుత ఆరోగ్య స్థితిని అధ్యయనం చేయడంలో సహాయపడుతుంది. మీ

వాంఛనీయ స్థాయి ఆరోగ్యాన్ని సృష్టించే దిశగా పనిచేయడానికి తగిన దిశను ఎంచుకోవడంలో ఈ సమాచారం నాకు సహాయం చేస్తుంది.

## విభాగం 1: డెమోగ్రాఫిక్ వివరాలు

1. వయస్సు:
2. లింగం:
3. ఎత్తు:
4. బరువు:
5. క్యాన్సర్ నిర్ధారణ:
6. క్యాన్సర్ దశ:
7. ఏదైనా సహ-అనారోగ్యాలు:

**విభాగం 2: కెమోథెరపీ అసెస్మెంట్:**

- 8) పాక్లిటాక్సెన్ ఆధారిత నియమావళి రకం ఏమిటి \_\_\_\_\_
- 9) మీరు పాక్లిటాక్సెన్ కీమోథెరపీ యొక్క ఎన్ని చక్రాలను పూర్తి చేశారు?
- (ఎ) 1-3 (బి) 4-6 (సి) >6
- 10) మీ నియమావళిలో పాక్లిటాక్సెన్ యొక్క ప్రస్తుత మోతాదు ఏమిటి \_\_\_\_\_
- 11) మీరు ఎంత తరచుగా పాక్లిటాక్సెన్ కీమోథెరపీని స్వీకరిస్తారు?
- (ఎ) 7 రోజులు (బి) 15 రోజులు (సి) 21 రోజులు
- 12) కీమోథెరపీ సైకిల్స్ లో మీరు పురోగతి చెందుతున్నప్పుడు మీ అంత్య భాగాలలో తిమ్మిరి, జలదరింపు లేదా నొప్పి పెరగడాన్ని మీరు గమనించారా, అవును అయితే, ప్రతి చక్రం తర్వాత అది తీవ్రమవుతుందా \_\_\_\_\_
- 13) మీరు పాక్లిటాక్సెన్ తో సంకర్షణ చెందగల లేదా న్యూరోటాక్సిసిటీకి దోహదపడే క్రింది మందులలో దేనినైనా తీసుకుంటారా?
- (ఎ) యాంటిడిప్రెసెంట్స్ (బి) యాంటీ ఇన్ ఫ్లమేటరీ ఏజెంట్లు
- (సి) యాంటీ కన్వల్సెంట్స్ (డి) ఇతరులు: \_\_\_\_\_

### విభాగం 3: న్యూరోటాక్సిసిటీ అసెస్మెంట్

## □ ఇంద్రియ లక్షణాలు

14) మీరు మీ చేతులు లేదా పాదాలలో తిమ్మిరి లేదా జలదరింపును అనుభవించారా?

(ఎ) గ్రేడ్ 0: అస్సలు కాదు (బి) గ్రేడ్ 1: తేలికపాటి

(సి) గ్రేడ్ 2: మితమైన (డి) గ్రేడ్ 3: తీవ్రమైన

15) మీరు ఏదైనా న్యూరోపతిక్ నొప్పిని అనుభవించారా?

(ఎ) గ్రేడ్ 0: అస్సలు కాదు (బి) గ్రేడ్ 1: తేలికపాటి

(సి) గ్రేడ్ 2: మితమైన (డి) గ్రేడ్ 3: తీవ్రమైన

16) మీ చేతులు లేదా కాళ్ళలో అనుభూతి తగ్గినట్లు మీరు భావించారా?

(ఎ) గ్రేడ్ 0: అస్సలు కాదు (బి) గ్రేడ్ 1: తేలికపాటి

(సి) గ్రేడ్ 2: మితమైన (డి) గ్రేడ్ 3: తీవ్రమైన

17) మీరు స్పర్శ లేదా ఉష్ణోగ్రతకు సున్నితత్వం పెరిగినట్లు భావించారా? (ఉదా: చల్లని/వేడి వస్తువులు)

(ఎ) గ్రేడ్ 0: అస్సలు కాదు (బి) గ్రేడ్ 1: తేలికపాటి

(సి) గ్రేడ్ 2: మితమైన (డి) గ్రేడ్ 3: తీవ్రమైన

#### □ మోటారు లక్షణాలు

18) మీ రోజువారీ కార్యకలాపాలను ప్రభావితం చేసే కండరాల బలహీనతను మీరు ఎదుర్కొన్నారా?

(ఎ) గ్రేడ్ 0: అస్సలు కాదు (బి) గ్రేడ్ 1: తేలికపాటి

(సి) గ్రేడ్ 2: మితమైన (డి) గ్రేడ్ 3: తీవ్రమైన

19) కండరాల బలహీనత కారణంగా మీరు నిలబడటానికి లేదా నడవడానికి ఇబ్బంది పడ్డారా?

(ఎ) గ్రేడ్ 0: అస్సలు కాదు (బి) గ్రేడ్ 1: తేలికపాటి

(సి) గ్రేడ్ 2: మితమైన (డి) గ్రేడ్ 3: తీవ్రమైన

20) కండరాల బలహీనత కారణంగా మీరు వస్తువులను పట్టుకోవడం లేదా పట్టుకోవడంలో ఇబ్బందిని ఎదుర్కొన్నారా?

(ఎ) గ్రేడ్ 0: అస్సలు కాదు (బి) గ్రేడ్ 1: తేలికపాటి

(సి) గ్రేడ్ 2: మితమైన (డి) గ్రేడ్ 3: తీవ్రమైన

□ **అటానమిక్ లక్షణాలు**

21) మీరు నిలబడి ఉన్నప్పుడు మైకము లేదా మూర్ఛను అనుభవించారా?

(ఎ) గ్రేడ్ 0 - అస్సలు కాదు (బి) గ్రేడ్ 1- తేలికపాటి

(సి) గ్రేడ్ 2- మోడరేట్ (డి) గ్రేడ్ 3 - తీవ్రమైన

22) మీరు అధికంగా చెమట పట్టడం గమనించారా?

(ఎ) గ్రేడ్ 0 - అస్సలు కాదు (బి) గ్రేడ్ 1- తేలికపాటి

(సి) గ్రేడ్ 2- మోడరేట్ (డి) గ్రేడ్ 3 - తీవ్రమైన

23) మీకు అజీర్ణం అనిపించిందా?

(ఎ) గ్రేడ్ 0 - అస్సలు కాదు (బి) గ్రేడ్ 1- తేలికపాటి

(సి) గ్రేడ్ 2- మోడరేట్ (డి) గ్రేడ్ 3 - తీవ్రమైన

24) మీ అంత్య భాగాలలో మీరు ఎంత తరచుగా మంట, నొప్పిని అనుభవిస్తున్నారు?

(ఎ) గ్రేడ్ 0 - అస్సలు కాదు (బి) గ్రేడ్ 1- తేలికపాటి

(సి) గ్రేడ్ 2- మోడరేట్ (డి) గ్రేడ్ 3 - తీవ్రమైన

**విభాగం 4 : జీవిత మూల్యాంకనం యొక్క నాణ్యత**

□ **శారీరక పనితీరు**

25) గత వారంలో మీ మొత్తం జీవన నాణ్యతలో ఏదైనా క్షీణతను మీరు అనుభవించారా?

(ఎ) అస్సలు కాదు (బి) కొద్దిగా

(సి) కొంచెం (డి) చాలా

26) చికిత్స కారణంగా మీకు నిద్ర పట్టడం లేదా?

(ఎ) అస్సలు కాదు (బి) కొద్దిగా

(సి) కొంచెం (డి) చాలా

27) మీకు అలసటగా అనిపించిందా?

(ఎ) అస్సలు కాదు (బి) కొద్దిగా

(సి) కొంచెం (డి) చాలా

28) మీరు నడవడం లేదా రోజువారీ కార్యకలాపాలు చేయడంలో ఇబ్బందిని ఎదుర్కొన్నారా?

(ఎ) అస్సలు కాదు (బి) కొద్దిగా

(సి) కొంచెం (డి) చాలా

29) ఆకలి లేకపోవడం వల్ల మీకు ఆహారం తీసుకోవడంలో ఇబ్బంది ఉందా?

(ఎ) అస్సలు కాదు (బి) కొద్దిగా

(సి) కొంచెం (డి) చాలా

30) రోజువారీ కార్యకలాపాలను నిర్వహించడానికి మీకు ఏదైనా సహాయం అవసరమా?

(ఎ) అస్సలు కాదు (బి) కొద్దిగా

(సి) కొంచెం (డి) చాలా

#### □ సామాజిక పనితీరు

31) మీ అనారోగ్యం లేదా చికిత్స మీ కుటుంబ జీవితం లేదా సామాజిక పరస్పర చర్యలను ప్రభావితం చేసిందా?

(ఎ) అస్సలు కాదు (బి) కొద్దిగా

(సి) కొంచెం (డి) చాలా

32) మీరు కుటుంబం లేదా స్నేహితుల నుండి ఒంటరిగా లేదా వైదొలగినట్లు భావించారా?

(ఎ) అస్సలు కాదు (బి) కొద్దిగా

(సి) కొంచెం (డి) చాలా

□ అభిజ్ఞా పనితీరు

33) మీరు విషయాలను గుర్తుంచుకోవడం లో ఇబ్బందిని ఎదుర్కొన్నారా?

(ఎ) అస్సలు కాదు (బి) కొద్దిగా

(సి) కొంచెం (డి) చాలా

34) మీరు దృష్టి కేంద్రీకరించడంలో ఇబ్బందిని గమనించారా?

(ఎ) అస్సలు కాదు (బి) కొద్దిగా

(సి) కొంచెం (డి) చాలా

35) పనుల సమయంలో తగ్గిన శ్రద్ధ లేదా మానసిక పదును మీరు గమనించారా?

(ఎ) అస్సలు కాదు (బి) కొద్దిగా

(సి) కొంచెం (డి) చాలా
